# Supplementary material
Source: PubMed Central journal article supplement (PMC10366946)
Supplement: jamainternmed-e233064-s001.pdf [file jamainternmed-e233064-s001.pdf]

## Supplementary Online Content

Pomeroy ML, Cudjoe TKM, Cuellar AE, et al. Association of social isolation with hospitalization and nursing home entry among community-dwelling older adults. *JAMA Intern Med*. Published online July 24, 2023. doi:10.1001/jamainternmed.2023.3064

**eFigure.** Stacked Data Structure Used to Examine the Impact of Social Isolation on Outcomes Over the Following Two Years Using the Health and Retirement Study

**eTable 1.** Six-Item Measure of Social Isolation in the Health and Retirement Study

**eTable 2.** Factors Associated With Hospitalization Among Community-Dwelling Older Adults

**eTable 3.** Factors Associated With Skilled Nursing Facility Stays Among Community-Dwelling Older Adults

**eTable 4.** Factors Associated With Nursing Home Placement Among Previously Community-Dwelling Older Adults

This supplementary material has been provided by the authors to give readers additional information about their work.

**eFigure. Stacked data structure used to examine the impact of social isolation on outcomes over the following two years using the Health and Retirement Study**

| Social Isolation Time 1 |          | Social Isolation Time 2 |          | Social Isolation Time 3 |          |
|-------------------------|----------|-------------------------|----------|-------------------------|----------|
| 2006                    | 2008     | 2010                    | 2012     | 2014                    | 2016     |
| Sample A                | Sample B | Sample A                | Sample B | Sample A                | Sample B |

  

| Outcomes Time 1 |          | Outcomes Time 2 |          | Outcomes Time 3 |          |
|-----------------|----------|-----------------|----------|-----------------|----------|
| 2008            | 2010     | 2012            | 2014     | 2016            | 2018     |
| Sample A        | Sample B | Sample A        | Sample B | Sample A        | Sample B |

*Notes:* The Health and Retirement Study (HRS) collects psychosocial data every other wave using a self-administered questionnaire (SAQ) which is left behind with participants at the end of the enhanced in-person interview. Each wave, a rotating random 50% sample of the larger core HRS sample is assigned to complete the SAQ. This analysis examined how social isolation and covariates in an index year (Sample A: 2006, 2010, 2014; Sample B: 2008, 2012, 2016) impacted outcomes (hospitalization, skilled nursing facility stays, nursing home placement) over the subsequent 2 years (Sample A: 2008, 2012, 2016; Sample B: 2010, 2014, 2018).

**eTable 1. Six-item measure of social isolation in the Health and Retirement Study**

| <b>Domain</b>                     | <b>Metric</b>                                                                              | <b>Points</b> |
|-----------------------------------|--------------------------------------------------------------------------------------------|---------------|
| Marital status <sup>a</sup>       | Not married                                                                                | 1             |
| Living arrangement <sup>b</sup>   | Lives alone                                                                                | 1             |
| Social contact <sup>c</sup>       | Less than monthly contact with children                                                    | 1             |
|                                   | Less than monthly contact with other family                                                | 1             |
|                                   | Less than monthly contact with friends                                                     | 1             |
| Social participation <sup>d</sup> | Less than monthly participation in any groups, clubs, organizations, or religious services | 1             |

<sup>a</sup>Marital status was coded as 0 = married or partnered and as 1 = separated, divorced, widowed, or never married.

<sup>b</sup>Living arrangement was dichotomized into 0 = more than 1 person in the household versus 1 = lives alone.

<sup>c</sup>Nine questions asked, on average, how often respondents meet up with, speak on the phone with, or write to children, family, or friends who do not live with them. Responses to each of these questions included: three or more times a week; once or twice a week; once or twice a month; every few months; once or twice a year; or, less than once a year/never. The three forms of contact (meet, speak, write) were collapsed into one variable each for children, family, and friends. The resulting three variables were coded as 0 = once a month or more versus 1 = less than monthly.

<sup>d</sup>Variables capturing participation in groups, clubs, organizations, or religious services were combined to create a single indicator, where participation in these activities was denoted as 0 = once a month or more and 1 = less than monthly.

**eTable 2. Factors Associated with Hospitalization among Community-dwelling Older Adults**

| Characteristic                                          | Odds Ratio  | 95% Confidence Interval | P-Value |
|---------------------------------------------------------|-------------|-------------------------|---------|
| Social isolation score                                  | 0.97        | 0.93 – 1.01             | 0.130   |
| Loneliness score                                        | 1.01        | 0.98 – 1.05             | 0.398   |
| Depression score <sup>***</sup>                         | 1.09        | 1.06 – 1.12             | <0.001  |
| Time point                                              |             |                         |         |
| Time 1 (2008-2010)                                      | <i>Ref.</i> |                         |         |
| Time 2 (2012-2014) <sup>**</sup>                        | 0.86        | 0.78 – 0.94             | 0.002   |
| Time 3 (2016-2018) <sup>***</sup>                       | 0.78        | 0.70 – 0.86             | <0.001  |
| Female                                                  | 0.94        | 0.85 – 1.03             | 0.187   |
| Age, years                                              |             |                         |         |
| 65 to 74                                                | <i>Ref.</i> |                         |         |
| 75 to 84 <sup>***</sup>                                 | 1.40        | 1.28 – 1.54             | <0.001  |
| 85 to 94 <sup>***</sup>                                 | 1.78        | 1.53 – 2.08             | <0.001  |
| 95 or older <sup>***</sup>                              | 3.85        | 1.93 – 7.67             | <0.001  |
| Race                                                    |             |                         |         |
| White                                                   | <i>Ref.</i> |                         |         |
| Black                                                   | 0.85        | 0.73 – 1.00             | 0.051   |
| Other                                                   | 1.09        | 0.83 – 1.43             | 0.532   |
| Hispanic <sup>***</sup>                                 | 0.62        | 0.50 – 0.76             | <0.001  |
| Medicaid <sup>**</sup>                                  | 1.30        | 1.07 – 1.57             | 0.009   |
| Smokes <sup>**</sup>                                    | 1.27        | 1.07 – 1.51             | 0.005   |
| Not physically active <sup>**</sup>                     | 1.14        | 1.04 – 1.25             | 0.005   |
| ADL difficulty score <sup>***</sup>                     | 1.29        | 1.17 – 1.42             | <0.001  |
| IADL difficulty score                                   | 1.02        | 0.90 – 1.16             | 0.747   |
| Number of chronic illnesses <sup>***</sup>              | 1.40        | 1.35 – 1.46             | <0.001  |
| Alzheimer's disease and related dementias <sup>**</sup> | 1.59        | 1.19 – 2.14             | 0.002   |

*Notes.* Weighted N = 209,922,113; Unweighted n = 21,209 person-years. Social isolation was measured through a 6-item scale with scores ranging from 0-6 and higher scores indicating more severe social isolation. Loneliness was measured through the 3-item UCLA Loneliness Scale with scores ranging from 3-9 and higher scores indicating more severe loneliness. Depressive symptoms were measured through the 8-item Center for Epidemiological Studies-Depression Scale with scores ranging from 0-8 and higher scores indicating more severe depression.

*Abbreviations.* Ref: reference group; ADL: activities of daily living; IADL: instrumental activities of daily living.

\*Significant at  $p < 0.05$ .

\*\*Significant at  $p < 0.01$ .

\*\*\*Significant at  $p \leq 0.001$ .

**eTable 3. Factors Associated with Skilled Nursing Facility Stays among Community-dwelling Older Adults**

| Characteristic                                         | Odds Ratio  | 95% Confidence Interval | P-Value |
|--------------------------------------------------------|-------------|-------------------------|---------|
| Social isolation score <sup>***</sup>                  | 1.16        | 1.06 – 1.28             | <0.001  |
| Loneliness score                                       | 0.99        | 0.92 – 1.07             | 0.842   |
| Depression score <sup>**</sup>                         | 1.08        | 1.02 – 1.15             | 0.010   |
| Time point                                             |             |                         |         |
| Time 1 (2008-2010)                                     | <i>Ref.</i> |                         |         |
| Time 2 (2012-2014)                                     | 1.01        | 0.79 – 1.30             | 0.907   |
| Time 3 (2016-2018)                                     | 0.90        | 0.70 – 1.17             | 0.441   |
| Female <sup>**</sup>                                   | 1.39        | 1.10 – 1.75             | 0.006   |
| Age, years                                             |             |                         |         |
| 65 to 74                                               | <i>Ref.</i> |                         |         |
| 75 to 84 <sup>***</sup>                                | 2.56        | 1.99 – 3.28             | <0.001  |
| 85 to 94 <sup>***</sup>                                | 4.88        | 3.48 – 6.85             | <0.001  |
| 95 or older <sup>**</sup>                              | 6.86        | 1.92 – 24.51            | 0.003   |
| Race                                                   |             |                         |         |
| White                                                  | <i>Ref.</i> |                         |         |
| Black                                                  | 0.67        | 0.45 – 1.01             | 0.058   |
| Other                                                  | 0.65        | 0.28 – 1.51             | 0.315   |
| Hispanic <sup>*</sup>                                  | 0.53        | 0.28 – 0.99             | 0.046   |
| Medicaid                                               | 0.88        | 0.66 – 1.41             | 0.601   |
| Smokes                                                 | 0.77        | 0.48 – 1.22             | 0.262   |
| Not physically active <sup>***</sup>                   | 1.82        | 1.45 – 2.28             | <0.001  |
| ADL difficulty score <sup>***</sup>                    | 1.65        | 1.37 – 1.99             | <0.001  |
| IADL difficulty score                                  | 0.91        | 0.71 – 1.18             | 0.482   |
| Number of chronic illnesses <sup>***</sup>             | 1.43        | 1.30 – 1.57             | <0.001  |
| Alzheimer's disease and related dementias <sup>*</sup> | 1.80        | 1.04 – 3.12             | 0.036   |

*Notes.* Weighted N = 209,422,777; Unweighted n = 21,159 person-years. Social isolation was measured through a 6-item scale with scores ranging from 0-6 and higher scores indicating more severe social isolation. Loneliness was measured through the 3-item UCLA Loneliness Scale with scores ranging from 3-9 and higher scores indicating more severe loneliness. Depressive symptoms were measured through the 8-item Center for Epidemiological Studies-Depression Scale with scores ranging from 0-8 and higher scores indicating more severe depression.  
*Abbreviations.* Ref: reference group; ADL: activities of daily living; IADL: instrumental activities of daily living.

\*Significant at  $p < 0.05$ .

\*\*Significant at  $p \leq 0.01$ .

\*\*\*Significant at  $p \leq 0.001$ .

**eTable 4. Factors Associated with Nursing Home Placement Among Previously Community-dwelling Older Adults**

| Characteristic                                          | Odds Ratio  | 95% Confidence Interval | P-Value |
|---------------------------------------------------------|-------------|-------------------------|---------|
| Social isolation score**                                | 2.01        | 1.21 – 3.32             | 0.007   |
| Loneliness score*                                       | 1.43        | 1.08 – 1.90             | 0.012   |
| Depression score                                        | 1.02        | 0.84 – 1.23             | 0.835   |
| Time point                                              |             |                         |         |
| Time 1 (2008-2010)                                      | <i>Ref.</i> |                         |         |
| Time 2 (2012-2014)                                      | 1.64        | 0.56 – 4.80             | 0.368   |
| Time 3 (2016-2018)                                      | 2.89        | 0.53 – 15.74            | 0.220   |
| Female                                                  | 2.30        | 0.96 – 5.51             | 0.062   |
| Age, years <sup>a</sup>                                 |             |                         |         |
| 65 to 74                                                | <i>Ref.</i> |                         |         |
| 75 to 84**                                              | 21.55       | 2.18 – 212.75           | 0.009   |
| 85 to 94 <sup>†</sup>                                   | 1594.61     | 1.59 – 1601627          | 0.037   |
| 95 or older <sup>†</sup>                                | 24832.44    | 7.05 – 87500000         | 0.015   |
| Race                                                    |             |                         |         |
| White                                                   | <i>Ref.</i> |                         |         |
| Black <sup>†</sup>                                      | 0.19        | 0.05 – 0.80             | 0.024   |
| Other                                                   | 0.24        | 0.02 – 3.40             | 0.292   |
| Hispanic <sup>†</sup>                                   | 0.04        | 0.003 – 0.62            | 0.021   |
| Medicaid                                                | 1.92        | 0.65 – 5.68             | 0.238   |
| Smokes <sup>†</sup>                                     | 0.19        | 0.04 – 0.94             | 0.041   |
| Not physically active**                                 | 3.27        | 1.51 – 7.09             | 0.003   |
| ADL difficulty score <sup>†</sup>                       | 2.46        | 1.22 – 4.96             | 0.012   |
| IADL difficulty score <sup>†</sup>                      | 1.96        | 1.09 – 3.54             | 0.026   |
| Number of chronic illnesses                             | 1.06        | 0.83 – 1.36             | 0.633   |
| Alzheimer's disease and related dementias <sup>a†</sup> | 56.06       | 2.14 – 1466.11          | 0.016   |

*Notes.* Weighted N = 210,813,081; Unweighted n = 21,294 person-years. Social isolation was measured through a 6-item scale with scores ranging from 0-6 and higher scores indicating more severe social isolation. Loneliness was measured through the 3-item UCLA Loneliness Scale with scores ranging from 3-9 and higher scores indicating more severe loneliness. Depressive symptoms were measured through the 8-item Center for Epidemiological Studies-Depression Scale with scores ranging from 0-8 and higher scores indicating more severe depression.

*Abbreviations.* Ref: reference group; ADL: activities of daily living; IADL: instrumental activities of daily living; ADRD: Alzheimer's disease and related dementias.

<sup>a</sup>Unstable estimates for odds ratios and confidence intervals are associated with small cell size.

\*Significant at  $p < 0.05$ .

\*\*Significant at  $p < 0.01$ .

\*\*\*Significant at  $p \leq 0.001$ .
