# Supplementary material
Source: PubMed Central journal article supplement (PMC10366946)
Supplement: jamainternmed-e233064-s002.pdf [file jamainternmed-e233064-s002.pdf]

## Data Sharing Statement

Pomeroy. Association of Social Isolation With Hospitalization and Nursing Home Entry Among Community-Dwelling Older Adults. *JAMA Intern Med.* Published July 24, 2023.  
doi:10.1001/jamainternmed.2023.3064

### Data

**Data available:** No
